# Supplementary material for: Upadacitinib in Rheumatoid Arthritis: A Benefit–Risk Assessment Across a Phase III Program
Source: PubMed Central journal article supplement — Drug Saf. 2021 Feb 2;44(5):515–30. doi: 10.1007/s40264-020-01036-w (PMC8053169; doi:10.1007/s40264-020-01036-w), 2021-02-02
Supplement: 40264_2020_1036_MOESM1_ESM.pdf [file 40264_2020_1036_MOESM1_ESM.pdf]

## Online Resource Table 1

### Upadacitinib in Rheumatoid Arthritis: A Benefit–Risk Assessment Across a Phase III Program

Philip G. Conaghan<sup>1</sup> · Eduardo Mysler<sup>2</sup> · Yoshiya Tanaka<sup>3</sup> · Barbara Da Silva-Tillmann<sup>4</sup> · Tim Shaw<sup>5</sup> · John Liu<sup>4</sup> · Ryan Ferguson<sup>4</sup> · Jeffrey V. Enejosa<sup>4</sup> · Stanley Cohen<sup>6</sup> · Peter Nash<sup>7</sup> · William Rigby<sup>8</sup> · Gerd Burmester<sup>9</sup>

<sup>1</sup> Leeds Institute of Rheumatic and Musculoskeletal Medicine, University of Leeds, and National Institute for Health Research Leeds Biomedical Research Centre, Leeds, UK (ORCID: 0000-0002-3478-5665)

<sup>2</sup> Organización Médica de Investigación, Buenos Aires, Argentina

<sup>3</sup> The First Department of Internal Medicine, University of Occupational and Environmental Health Japan, Kitakyushu, Japan (ORCID: 0000-0002-0807-7139)

<sup>4</sup> AbbVie Inc., North Chicago, IL, USA

<sup>5</sup> AbbVie Ltd, Maidenhead, UK

<sup>6</sup> Metroplex Clinical Research Center, Dallas, TX, USA (ORCID: 0000-00002-9226-979x)

<sup>7</sup> Griffith University, Brisbane, Queensland, Australia

<sup>8</sup> Dartmouth-Hitchcock Medical Center, Lebanon, NH, USA (ORCID: 0000-0002-1382-7299)

<sup>9</sup> Charité-Universitätsmedizin Berlin, Berlin, Germany (ORCID: 0000-0001-7518-1131)

Corresponding author: Philip Conaghan ([p.conaghan@leeds.ac.uk](mailto:p.conaghan@leeds.ac.uk))

**Online Resource Table 1** Overview of the upadacitinib phase III clinical program in RA.

|                            | <b>SELECT-EARLY</b>                            | <b>SELECT-NEXT</b>             | <b>SELECT-COMPARE</b>          | <b>SELECT-MONOTHERAPY</b>      | <b>SELECT-BEYOND</b>           |
|----------------------------|------------------------------------------------|--------------------------------|--------------------------------|--------------------------------|--------------------------------|
| <b>Patient populations</b> | MTX-naïve                                      | csDMARD-IR                     | MTX-IR                         | MTX-IR                         | Biologic-IR                    |
| <b>Scheme</b>              | Mono                                           | Combo                          | Combo                          | Mono                           | Combo                          |
| <b>Background</b>          | —                                              | csDMARDs                       | MTX                            | —<br>(PBO group continued MTX) | csDMARDs                       |
| <b>Active comparator</b>   | MTX                                            | —                              | ADA                            | MTX                            | —                              |
| <b>Aims</b>                | UPA 7.5 mg<br>(Japan only)<br>( <i>n</i> = 55) | —                              | —                              | —                              | —                              |
|                            | UPA 15 mg<br>( <i>n</i> = 317)                 | UPA 15 mg<br>( <i>n</i> = 221) | UPA 15 mg<br>( <i>n</i> = 651) | UPA 15 mg<br>( <i>n</i> = 217) | UPA 15 mg<br>( <i>n</i> = 165) |
|                            | UPA 30 mg<br>( <i>n</i> = 314)                 | UPA 30 mg<br>( <i>n</i> = 219) | ADA 40 mg<br>( <i>n</i> = 327) | UPA 30 mg<br>( <i>n</i> = 215) | UPA 30 mg<br>( <i>n</i> = 165) |
|                            | MTX<br>( <i>n</i> = 314)                       | PBO<br>( <i>n</i> = 221)       | PBO<br>( <i>n</i> = 651)       | MTX<br>( <i>n</i> = 216)       | PBO<br>( <i>n</i> = 169)       |
| <b>Controlled duration</b> | 48 weeks                                       | 12 weeks                       | 48 weeks <sup>a</sup>          | 14 weeks                       | 24 weeks                       |
| <b>Total sample size</b>   | 1002                                           | 661                            | 1629                           | 648                            | 499                            |

|                   |             |             |             |             |             |
|-------------------|-------------|-------------|-------------|-------------|-------------|
| <b>NCT #</b>      | NCT02706873 | NCT02675426 | NCT02629159 | NCT02706951 | NCT02706847 |
| <b>Study #</b>    | M13-545     | M13-549     | M14-465     | M15-555     | M13-542     |
| <b>References</b> | [1, 2]      | [3]         | [4,5]       | [6]         | [7]         |

<sup>a</sup>PBO-controlled period 26 weeks, ADA-controlled period up to  $\geq 48$  weeks. *ADA* adalimumab, *combo* combination, *csDMARD* conventional synthetic disease-modifying antirheumatic drug, *EOW* every other week, *IR* inadequate responder, *mono* monotherapy, *MTX* methotrexate, *PBO* placebo, *RA* rheumatoid arthritis, *UPA* upadacitinib

## References

1. van Vollenhoven R, Takeuchi T, Pangan A, et al. Efficacy and safety of upadacitinib monotherapy in methotrexate-naïve patients with moderately to severely active rheumatoid arthritis (SELECT-EARLY): A randomized, double-blind, active-comparator, multi-center, multi-country trial. *Arthritis Rheum.* 2020;[Epub ahead of print].
2. A study to compare upadacitinib (ABT-494) monotherapy to methotrexate (MTX) monotherapy in adults with rheumatoid arthritis (RA) who have not previously taken methotrexate (SELECT-EARLY). <https://clinicaltrials.gov/ct2/show/NCT02706873> [Accessed 1 Dec 2020].
3. Burmester GR, Kremer JM, Van den Bosch F, et al. Safety and efficacy of upadacitinib in patients with rheumatoid arthritis and inadequate response to conventional synthetic disease-modifying anti-rheumatic drugs (SELECT-NEXT): A randomised, double-blind, placebo-controlled phase 3 trial 48. *Lancet.* 2018;391:2503–12.
4. Fleischmann R, Pangan A, Song IH, et al. Upadacitinib versus placebo or adalimumab in patients with rheumatoid arthritis and an inadequate response to methotrexate: results of a phase III, double-blind, randomized controlled trial. *Arthritis Rheum.* 2019;71:1788–800.
5. Fleischmann R, Genovese M, Enejosa J, et al. Safety and effectiveness of upadacitinib or adalimumab plus methotrexate in patients with rheumatoid arthritis over 48 weeks with switch to alternate therapy in patients with insufficient response. *Ann Rheum Dis.* 2019;78:1454–62.
6. Smolen J, Pangan A, Emery P, et al. Upadacitinib as monotherapy in patients with active rheumatoid arthritis and inadequate response to methotrexate (SELECT-MONOTHERAPY): A randomised, placebo-controlled, double-blind phase 3 study. *Lancet.* 2019;393:2303–11.
7. Genovese M, Fleischmann R, Combe B, et al. Safety and efficacy of upadacitinib in patients with active rheumatoid arthritis refractory to biologic disease-modifying anti-rheumatic drugs (SELECT-BEYOND): A double-blind, randomised controlled phase 3 trial. *Lancet.* 2018;391:2513–24.
