# Supplementary material for: Upadacitinib in Rheumatoid Arthritis: A Benefit–Risk Assessment Across a Phase III Program
Source: PubMed Central journal article supplement — Drug Saf. 2021 Feb 2;44(5):515–30. doi: 10.1007/s40264-020-01036-w (PMC8053169; doi:10.1007/s40264-020-01036-w), 2021-02-02
Supplement: 40264_2020_1036_MOESM2_ESM.pdf [file 40264_2020_1036_MOESM2_ESM.pdf]

## Online Resource Table 2

### Upadacitinib in Rheumatoid Arthritis: A Benefit–Risk Assessment Across a Phase III Program

Philip G. Conaghan<sup>1</sup> · Eduardo Mysler<sup>2</sup> · Yoshiya Tanaka<sup>3</sup> · Barbara Da Silva-Tillmann<sup>4</sup> · Tim Shaw<sup>5</sup> · John Liu<sup>4</sup> · Ryan Ferguson<sup>4</sup> · Jeffrey V. Enejosa<sup>4</sup> · Stanley Cohen<sup>6</sup> · Peter Nash<sup>7</sup> · William Rigby<sup>8</sup> · Gerd Burmester<sup>9</sup>

<sup>1</sup> Leeds Institute of Rheumatic and Musculoskeletal Medicine, University of Leeds, and National Institute for Health Research Leeds Biomedical Research Centre, Leeds, UK (ORCID: 0000-0002-3478-5665)

<sup>2</sup> Organización Médica de Investigación, Buenos Aires, Argentina

<sup>3</sup> The First Department of Internal Medicine, University of Occupational and Environmental Health Japan, Kitakyushu, Japan (ORCID: 0000-0002-0807-7139)

<sup>4</sup> AbbVie Inc., North Chicago, IL, USA

<sup>5</sup> AbbVie Ltd, Maidenhead, UK

<sup>6</sup> Metroplex Clinical Research Center, Dallas, TX, USA (ORCID: 0000-00002-9226-979x)

<sup>7</sup> Griffith University, Brisbane, Queensland, Australia

<sup>8</sup> Dartmouth-Hitchcock Medical Center, Lebanon, NH, USA (ORCID: 0000-0002-1382-7299)

<sup>9</sup> Charité-Universitätsmedizin Berlin, Berlin, Germany (ORCID: 0000-0001-7518-1131)

Corresponding author: Philip Conaghan ([p.conaghan@leeds.ac.uk](mailto:p.conaghan@leeds.ac.uk))

**Online Resource Table 2** Summary of patient-reported outcomes across upadacitinib clinical trials<sup>a</sup>

| Study                                                   | SELECT-EARLY <sup>b</sup> |                      | SELECT-NEXT <sup>c</sup> |                        | SELECT-COMPARE <sup>d</sup> |                           |                 | SELECT-MONOTHERAPY <sup>e</sup> |                     | SELECT-BEYOND <sup>e</sup> |                        |
|---------------------------------------------------------|---------------------------|----------------------|--------------------------|------------------------|-----------------------------|---------------------------|-----------------|---------------------------------|---------------------|----------------------------|------------------------|
| Patient populations                                     | MTX-naïve                 |                      | csDMARD-IR               |                        | MTX-IR                      |                           |                 | MTX-IR                          |                     | bDMARD-IR                  |                        |
| References                                              | [1, 2]                    |                      | [3, 4]                   |                        | [5, 6]                      |                           |                 | [7, 8]                          |                     | [9, 10]                    |                        |
| Arms                                                    | MTX                       | UPA 15 mg            | PBO → UPA 15 mg          | UPA 15 mg              | PBO + MTX                   | UPA 15 mg + MTX           | ADA 40 mg + MTX | MTX → UPA 15 mg                 | UPA 15 mg           | PBO → UPA 15 mg            | UPA 15 mg              |
| <i>N</i>                                                | 314                       | 317                  | 221                      | 221                    | 651                         | 651                       | 327             | 216                             | 217                 | 169                        | 164                    |
| <b>Least mean square change from baseline in HAQ-DI</b> |                           |                      |                          |                        |                             |                           |                 |                                 |                     |                            |                        |
| week 12 <sup>c</sup> /14 <sup>f</sup>                   | -0.5<br>( <i>n</i> = 313) | -0.8 <sup>***</sup>  | -0.3                     | -0.6 <sup>{††††}</sup> | -0.3                        | -0.6 <sup>{†††† ‡‡}</sup> | -0.5            | -0.3                            | -0.7 <sup>***</sup> | -0.2                       | -0.4 <sup>{††††}</sup> |
| week 24 <sup>g</sup> /26 <sup>h</sup>                   | -0.6<br>( <i>n</i> = 313) | -0.9 <sup>***</sup>  | —                        | —                      | —                           | —                         | —               | —                               | —                   | —                          | —                      |
| week 48 <sup>i</sup> /60 <sup>j</sup>                   | -0.74                     | -0.96 <sup>***</sup> | -0.79                    | -0.83                  | —                           | -0.7 <sup>‡‡</sup>        | -0.6            | -0.69                           | -0.73               | -0.52                      | -0.52                  |
| <b>Decrease from baseline in HAQ-DI ≥ 0.22 (MCID)</b>   |                           |                      |                          |                        |                             |                           |                 |                                 |                     |                            |                        |



|         |   |   |   |   |   |        |       |   |   |   |   |
|---------|---|---|---|---|---|--------|-------|---|---|---|---|
| week 48 | — | — | — | — | — | -101.7 | -95.5 | — | — | — | — |
|---------|---|---|---|---|---|--------|-------|---|---|---|---|

**Least mean square change from baseline in FACIT-F**

|                                  |           |           |           |           |     |           |     |   |   |   |   |
|----------------------------------|-----------|-----------|-----------|-----------|-----|-----------|-----|---|---|---|---|
| week                             | 6.8       | 10.0***   | 3.0       | 7.9[††††] | 4.8 | 9.0[†††]‡ | 7.4 | — | — | — | — |
| 12 <sup>c</sup> /14 <sup>f</sup> | (n = 277) | (n = 301) | (n = 207) | (n = 207) |     |           |     |   |   |   |   |

|                                  |           |           |   |   |     |         |     |   |   |   |   |
|----------------------------------|-----------|-----------|---|---|-----|---------|-----|---|---|---|---|
| week                             | 7.4       | 10.6***   | — | — | 5.5 | 9.7†††‡ | 8.2 | — | — | — | — |
| 24 <sup>g</sup> /26 <sup>h</sup> | (n = 268) | (n = 289) |   |   |     |         |     |   |   |   |   |

|         |     |                   |   |   |   |       |     |   |   |   |   |
|---------|-----|-------------------|---|---|---|-------|-----|---|---|---|---|
| week 48 | 8.5 | 10.1 <sup>#</sup> | — | — | — | 10.2‡ | 8.9 | — | — | — | — |
|---------|-----|-------------------|---|---|---|-------|-----|---|---|---|---|

**Least mean square change in patient's assessment of pain**

|                                  |           |           |       |           |       |               |       |       |           |   |   |
|----------------------------------|-----------|-----------|-------|-----------|-------|---------------|-------|-------|-----------|---|---|
| week                             | -25.4     | -36.3***  | -10.3 | -29.9†††† | -15.7 | -32.1†††††††† | -25.6 | -13.9 | -26.2**** | — | — |
| 12 <sup>c</sup> /14 <sup>f</sup> | (n = 278) | (n = 302) |       |           |       |               |       |       |           |   |   |

|                                  |           |           |   |   |   |   |   |   |   |   |   |
|----------------------------------|-----------|-----------|---|---|---|---|---|---|---|---|---|
| week                             | -28.4     | -39.8***  | — | — | — | — | — | — | — | — | — |
| 24 <sup>g</sup> /26 <sup>h</sup> | (n = 266) | (n = 288) |   |   |   |   |   |   |   |   |   |

|         |   |   |   |   |   |        |       |   |   |   |   |
|---------|---|---|---|---|---|--------|-------|---|---|---|---|
| week 48 | — | — | — | — | — | -36.7‡ | -32.1 | — | — | — | — |
|---------|---|---|---|---|---|--------|-------|---|---|---|---|

---

*ADA* adalimumab, *bDMARD* biologic disease-modifying antirheumatic drug, *BL* baseline, *csDMARD* conventional synthetic disease-modifying antirheumatic drug, *FACIT-F* Functional Assessment of Chronic Illness Therapy-Fatigue, *HAQ-DI* Health Assessment Questionnaire-Disability Index, *IR* inadequate responder, *LOCF* last observation carried forward, *MCID* minimal clinically important difference, *MTX* methotrexate, *NRI* non-responder imputation, *PBO* placebo, *PCS* physical component summary, *SF-36* Short Form-36 Physical Component Summary, *UPA* upadacitinib

<sup>a</sup>Missing data were imputed using: NRI for binary outcomes or mixed-model repeated measures with observed data for continuous outcomes, unless otherwise stated

<sup>b</sup>Multiple imputation and LOCF for continuous outcomes

<sup>c</sup>Week 48/60 data are reported as observed

<sup>d</sup>Binary outcomes analyzed by NRI for observations after rescue for patients rescued at weeks 14, 18, or 22; LOCF for observations after rescue for patients rescued at week 26; and continuous outcomes analyzed by LOCF for observations after rescue for patients rescued at weeks 14–26

<sup>e</sup>SELECT-EARLY, SELECT-NEXT, SELECT-COMPARE, and SELECT-BEYOND

<sup>f</sup>SELECT-MONOTHERAPY

<sup>g</sup>SELECT-EARLY

<sup>h</sup>SELECT-COMPARE

<sup>i</sup>SELECT-EARLY, SELECT-COMPARE, and SELECT-MONOTHERAPY

<sup>j</sup>SELECT-NEXT and SELECT-BEYOND

<sup>k</sup>SELECT-BEYOND

Comparisons adjusted for multiplicity: [<sup>\*\*</sup>]  $p \leq 0.01$ , [<sup>\*\*\*</sup>]  $p \leq 0.001$  vs MTX; [<sup>†††</sup>]  $p \leq 0.001$ , [<sup>††††</sup>]  $p \leq 0.0001$  vs placebo; [<sup>‡‡</sup>]  $p \leq 0.01$ , [<sup>‡‡‡</sup>]  $p \leq 0.001$  vs ADA

Comparisons unadjusted for multiplicity: Nominal  $\#p = 0.058$ , <sup>\*\*\*</sup>  $p \leq 0.001$ , <sup>\*\*\*\*</sup>  $p \leq 0.0001$  vs MTX; <sup>†††</sup>  $p \leq 0.001$ , <sup>††††</sup>  $p \leq 0.0001$  vs PBO; <sup>‡</sup>  $p \leq 0.05$ , <sup>‡‡</sup>  $p \leq 0.01$  vs ADA

## References

1. van Vollenhoven R, Takeuchi T, Pangan A, et al. Efficacy and safety of upadacitinib monotherapy in methotrexate-naïve patients with moderately to severely active rheumatoid arthritis (SELECT-EARLY): A randomized, double-blind, active-comparator, multi-center, multi-country trial. *Arthritis Rheum.* 2020;[Epub ahead of print].
2. van Vollenhoven R, Takeuchi T, Pangan A, et al. Monotherapy with upadacitinib in MTX-naïve patients with rheumatoid arthritis: Results at 48 weeks from the SELECT-EARLY study. *Ann Rheum Dis.* 2019;78:376–7.
3. Burmester GR, Kremer JM, Van den Bosch F, et al. Safety and efficacy of upadacitinib in patients with rheumatoid arthritis and inadequate response to conventional synthetic disease-modifying anti-rheumatic drugs (SELECT-NEXT): A randomised, double-blind, placebo-controlled phase 3 trial. *Lancet.* 2018;391:2503–12.
4. Burmester GR, Van den Bosch F, Bassette L, et al. Long-term safety and efficacy of upadacitinib in patients with rheumatoid arthritis and an inadequate response to csDMARDs: Results at 60 weeks from the select-next study. *Ann Rheum Dis.* 2019;78:735–6.
5. Fleischmann R, Pangan A, Song IH, et al. Upadacitinib versus placebo or adalimumab in patients with rheumatoid arthritis and an inadequate response to methotrexate: results of a phase III, double-blind, randomized controlled trial. *Arthritis Rheum.* 2019;71:1788–800.
6. Fleischmann R, Genovese M, Enejosa J, et al. Safety and effectiveness of upadacitinib or adalimumab plus methotrexate in patients with rheumatoid arthritis over 48 weeks with switch to alternate therapy in patients with insufficient response. *Ann Rheum Dis.* 2019;78:1454–62.
7. Smolen J, Pangan A, Emery P, et al. Upadacitinib as monotherapy in patients with active rheumatoid arthritis and inadequate response to methotrexate (SELECT-MONOTHERAPY): A randomised, placebo-controlled, double-blind phase 3 study. *Lancet.* 2019;393:2303–11.
8. Smolen J, Emery P, Rigby W, et al. Upadacitinib as monotherapy in patients with rheumatoid arthritis: Results at 48 weeks [Abstract]. *Arthritis Rheum.* 2019;71.

9. Genovese M, Fleischmann R, Combe B, et al. Safety and efficacy of upadacitinib in patients with active rheumatoid arthritis refractory to biologic disease-modifying anti-rheumatic drugs (SELECT-BEYOND): A double-blind, randomised controlled phase 3 trial. *Lancet*. 2018;391:2513–24.
10. Genovese M, Combe B, Hall S, et al. Upadacitinib in patients with rheumatoid arthritis and inadequate response or intolerance to biological DMARDS: Results at 60 weeks from the SELECT-BEYOND study. *Ann Rheum Dis*. 2019;78:360–1.
