# Supplementary material for: Upadacitinib in Rheumatoid Arthritis: A Benefit–Risk Assessment Across a Phase III Program
Source: PubMed Central journal article supplement — Drug Saf. 2021 Feb 2;44(5):515–30. doi: 10.1007/s40264-020-01036-w (PMC8053169; doi:10.1007/s40264-020-01036-w), 2021-02-02
Supplement: 40264_2020_1036_MOESM3_ESM.pdf [file 40264_2020_1036_MOESM3_ESM.pdf]

### Online Resource Table 3

## Upadacitinib in Rheumatoid Arthritis: A Benefit–Risk Assessment Across a Phase III

### Program

**Philip G. Conaghan<sup>1</sup> · Eduardo Mysler<sup>2</sup> · Yoshiya Tanaka<sup>3</sup> · Barbara Da Silva-Tillmann<sup>4</sup> · Tim Shaw<sup>5</sup> · John Liu<sup>4</sup> · Ryan Ferguson<sup>4</sup> · Jeffrey V. Enejosa<sup>4</sup> · Stanley Cohen<sup>6</sup> · Peter Nash<sup>7</sup> · William Rigby<sup>8</sup> · Gerd Burmester<sup>9</sup>**

<sup>1</sup> Leeds Institute of Rheumatic and Musculoskeletal Medicine, University of Leeds, and National Institute for Health Research Leeds Biomedical Research Centre, Leeds, UK (ORCID: 0000-0002-3478-5665)

<sup>2</sup> Organización Médica de Investigación, Buenos Aires, Argentina

<sup>3</sup> The First Department of Internal Medicine, University of Occupational and Environmental Health Japan, Kitakyushu, Japan (ORCID: 0000-0002-0807-7139)

<sup>4</sup> AbbVie Inc., North Chicago, IL, USA

<sup>5</sup> AbbVie Ltd, Maidenhead, UK

<sup>6</sup> Metroplex Clinical Research Center, Dallas, TX, USA (ORCID: 0000-00002-9226-979x)

<sup>7</sup> Griffith University, Brisbane, Queensland, Australia

<sup>8</sup> Dartmouth-Hitchcock Medical Center, Lebanon, NH, USA (ORCID: 0000-0002-1382-7299)

<sup>9</sup> Charité-Universitätsmedizin Berlin, Berlin, Germany (ORCID: 0000-0001-7518-1131)

Corresponding author: Philip Conaghan ([p.conaghan@leeds.ac.uk](mailto:p.conaghan@leeds.ac.uk))

**Online Resource Table 3** Event rates of herpes zoster for upadacitinib 15 mg once daily by region

|                       | <b>Total drug exposure (PYs)</b> | <b>Unique patients with herpes zoster</b> | <b>E/100PY (95% CI)</b> |
|-----------------------|----------------------------------|-------------------------------------------|-------------------------|
| North America         | 1187.4                           | 36                                        | 3.1 (2.2, 4.3)          |
| South/Central America | 874.2                            | 24                                        | 3.0 (1.9, 4.4)          |
| Eastern Europe        | 1638.8                           | 36                                        | 2.3 (1.6, 3.2)          |
| Western Europe        | 366.5                            | 15                                        | 4.9 (2.9, 7.8)          |
| Other                 | 240.6                            | 6                                         | 3.3 (1.4, 6.6)          |
| Asia                  | 258.3                            | 25                                        | 11.2 (7.5, 16.1)        |
| Japan                 | 130.8                            | 14                                        | 12.2 (7.0, 19.9)        |

*CI* confidence interval, *E/100PY* events per 100 patient-years, *PY* patient-year
