# Supplementary material for: Upadacitinib in Rheumatoid Arthritis: A Benefit–Risk Assessment Across a Phase III Program
Source: PubMed Central journal article supplement — Drug Saf. 2021 Feb 2;44(5):515–30. doi: 10.1007/s40264-020-01036-w (PMC8053169; doi:10.1007/s40264-020-01036-w), 2021-02-02
Supplement: 40264_2020_1036_MOESM4_ESM.pdf [file 40264_2020_1036_MOESM4_ESM.pdf]

**Online Resource Text 1**

**Upadacitinib in Rheumatoid Arthritis: A Benefit–Risk Assessment Across a Phase III**

**Program**

**Philip G. Conaghan<sup>1</sup> · Eduardo Mysler<sup>2</sup> · Yoshiya Tanaka<sup>3</sup> · Barbara Da Silva-Tillmann<sup>4</sup> · Tim Shaw<sup>5</sup> · John Liu<sup>4</sup> · Ryan Ferguson<sup>4</sup> · Jeffrey V. Enejosa<sup>4</sup> · Stanley Cohen<sup>6</sup> · Peter Nash<sup>7</sup> · William Rigby<sup>8</sup> · Gerd Burmester<sup>9</sup>**

<sup>1</sup> Leeds Institute of Rheumatic and Musculoskeletal Medicine, University of Leeds, and National Institute for Health Research Leeds Biomedical Research Centre, Leeds, UK (ORCID: 0000-0002-3478-5665)

<sup>2</sup> Organización Médica de Investigación, Buenos Aires, Argentina

<sup>3</sup> The First Department of Internal Medicine, University of Occupational and Environmental Health Japan, Kitakyushu, Japan (ORCID: 0000-0002-0807-7139)

<sup>4</sup> AbbVie Inc., North Chicago, IL, USA

<sup>5</sup> AbbVie Ltd, Maidenhead, UK

<sup>6</sup> Metroplex Clinical Research Center, Dallas, TX, USA (ORCID: 0000-00002-9226-979x)

<sup>7</sup> Griffith University, Brisbane, Queensland, Australia

<sup>8</sup> Dartmouth-Hitchcock Medical Center, Lebanon, NH, USA (ORCID: 0000-0002-1382-7299)

<sup>9</sup> Charité-Universitätsmedizin Berlin, Berlin, Germany (ORCID: 0000-0001-7518-1131)

Corresponding author: Philip Conaghan ([p.conaghan@leeds.ac.uk](mailto:p.conaghan@leeds.ac.uk))

**Online Resource Text 1** Outline of the efficacy and safety objectives of the phase III clinical program

The studies overall provide a robust assessment of the efficacy of upadacitinib in a broad range of rheumatoid arthritis populations on the basis of the following:

- The phase III program included head-to-head comparisons of standard-of-care therapies in two studies with adequate sample sizes and statistical power to evaluate differences in efficacy measures. SELECT-EARLY evaluated upadacitinib monotherapy vs methotrexate (MTX) monotherapy in an MTX-naïve population, while SELECT-COMPARE evaluated upadacitinib vs placebo and adalimumab in combination with background MTX in an MTX-inadequate response (IR) population.
- The efficacy of upadacitinib in combination with stable doses of background conventional synthetic disease-modifying antirheumatic drugs (csDMARDs) was evaluated in two additional placebo-controlled studies. SELECT-NEXT evaluated upadacitinib in combination with background MTX and/or other csDMARDs in a csDMARD-IR population, while SELECT-BEYOND evaluated upadacitinib in combination with background MTX and/or other csDMARDs in a biologic (b)DMARD-IR population, without regard for the nature and number of prior bDMARDs.
- The phase III program also included SELECT-MONOTHERAPY, which evaluated upadacitinib as monotherapy in an MTX-IR population. In this study, patients on stable doses of MTX were switched in a blinded fashion to upadacitinib monotherapy (no MTX washout) vs continuing their current dose of MTX.
